# Supplementary material for: Genetic Diversity and Population Structure in Vicia faba L. Landraces and Wild Related Species Assessed by Nuclear SSRs
Source: PubMed Central journal article supplement (PMC4864303; doi:10.1371/journal.pone.0154801), 2016-05-11

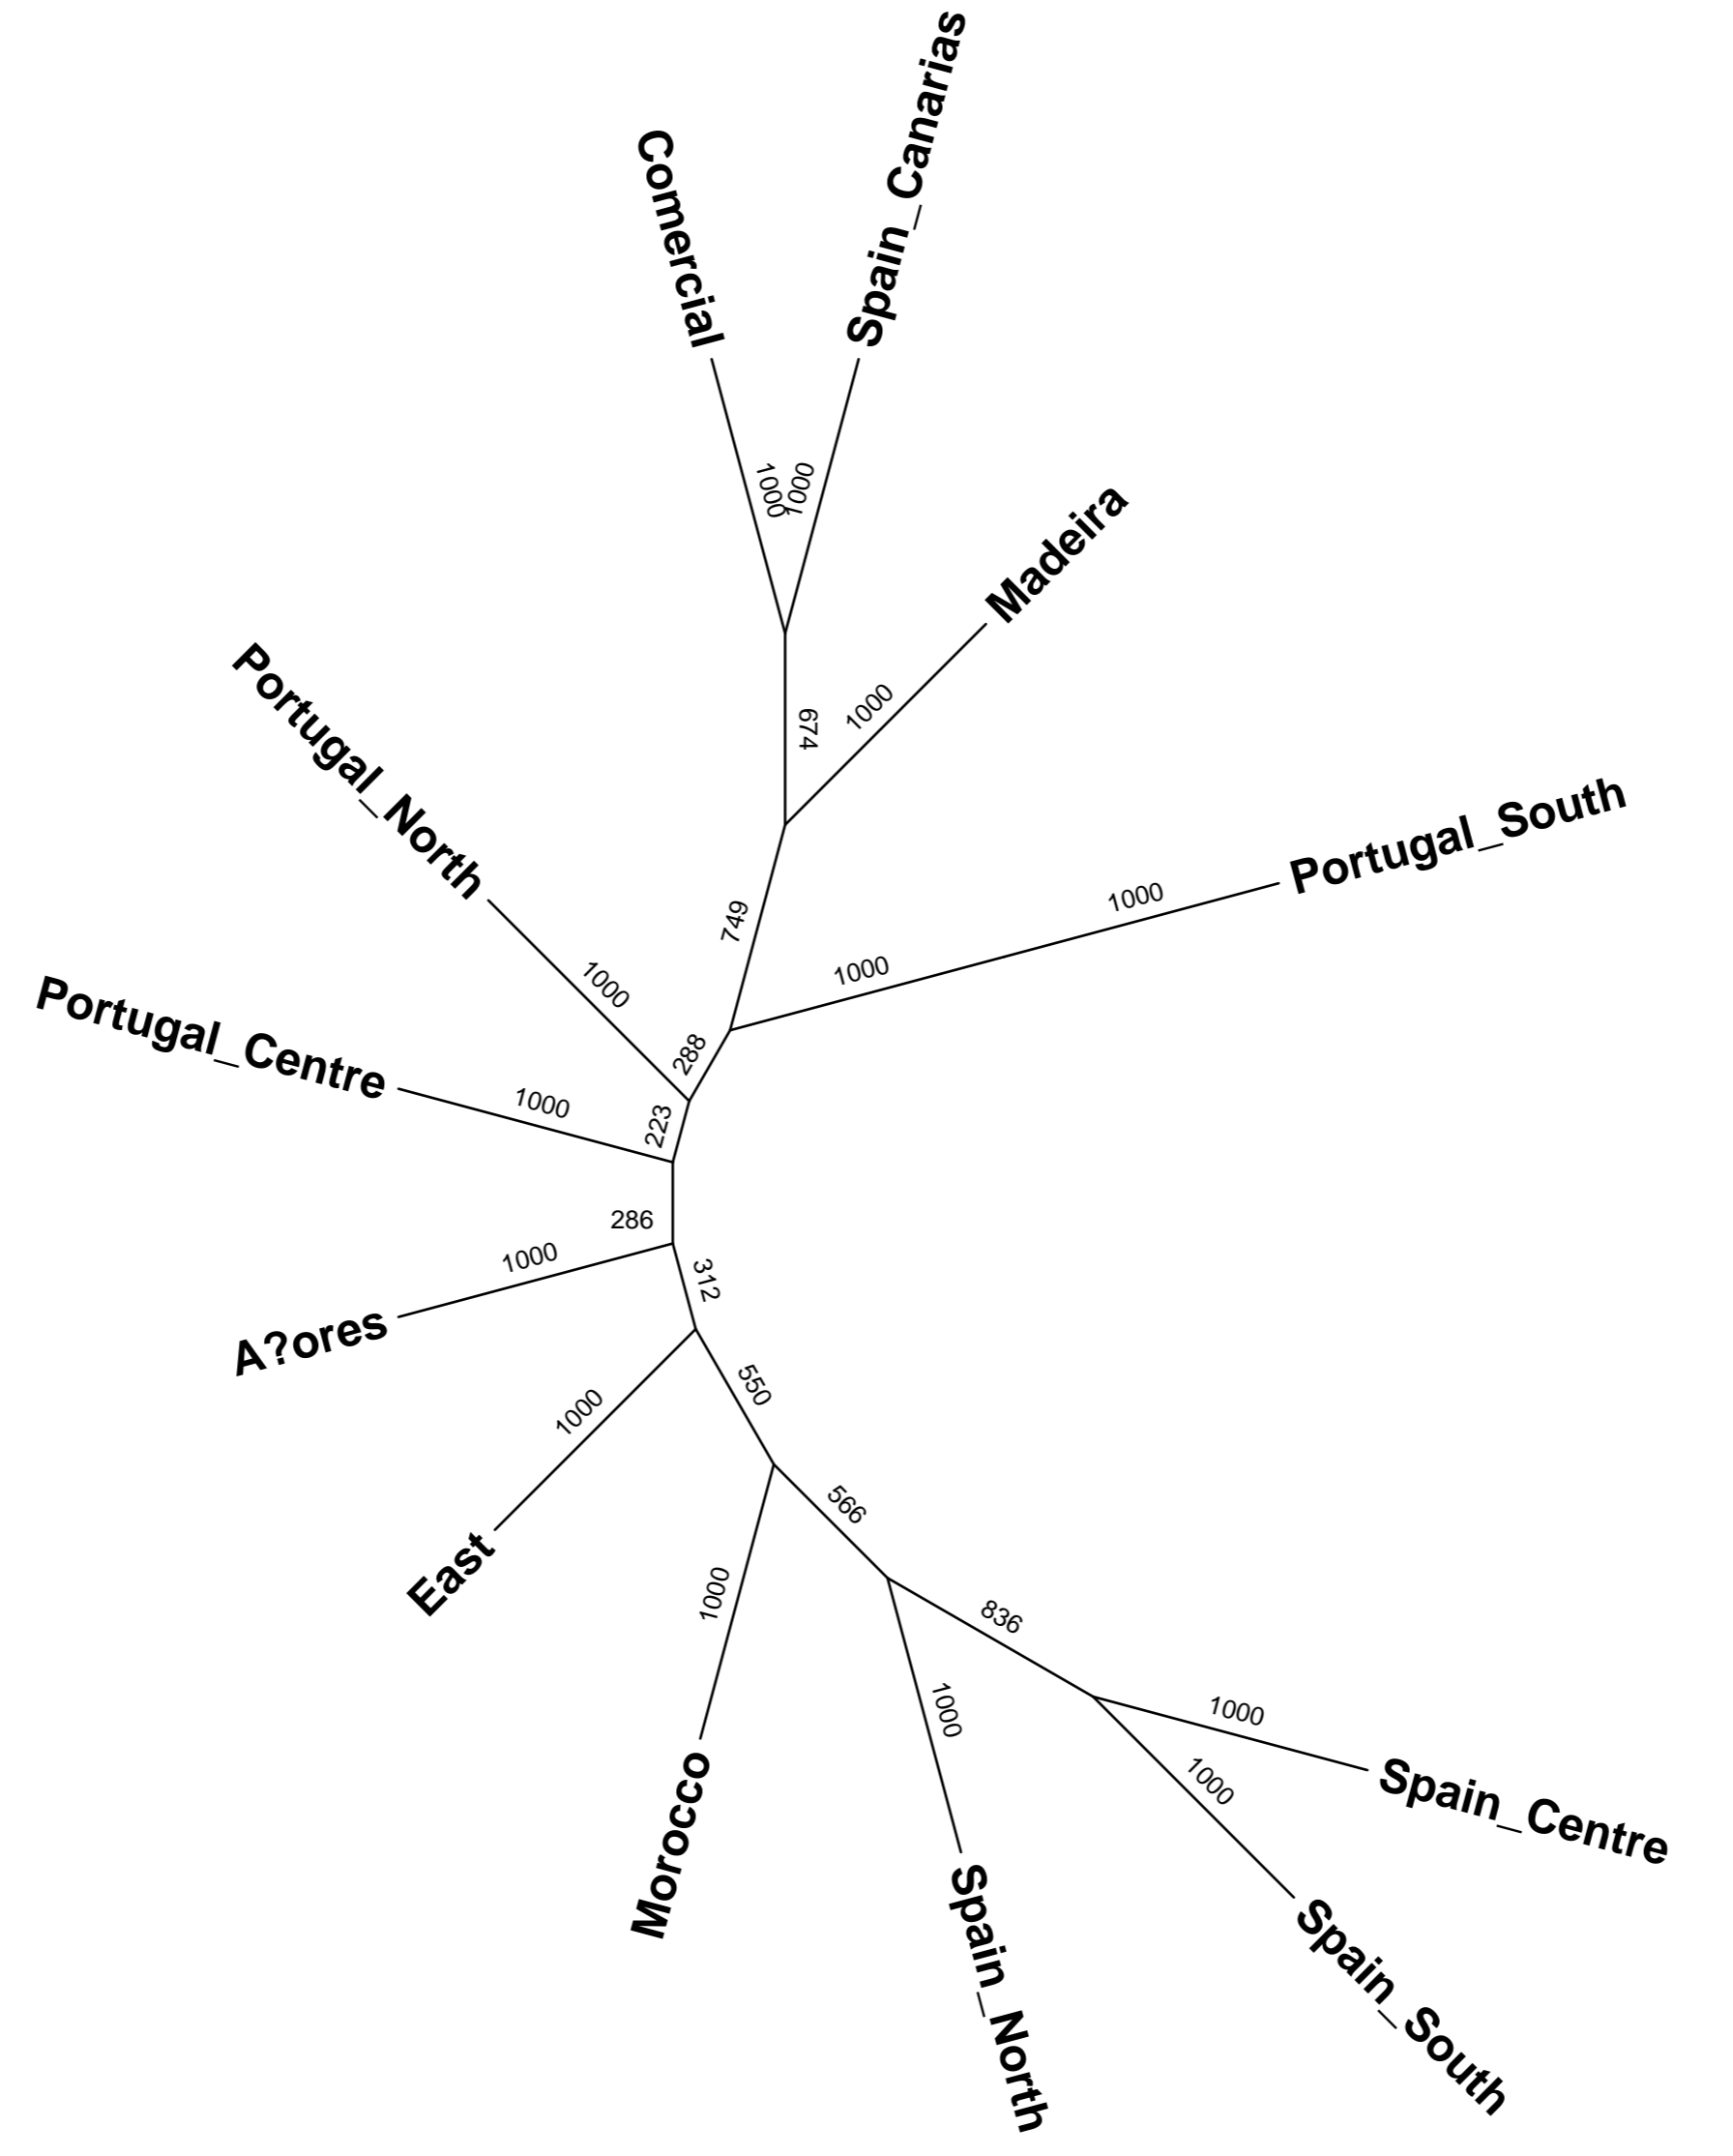

Supplement: pone.0154801.s007.pdf [file pone.0154801.s007.pdf]
